# Supplementary material
Source: publisher figshare collection journal article supplement (https://acs.figshare.com/ndownloader/files/11636519)
Supplement: Supplementary file 1 [file 11636519]

## Supporting Information

### Switching Brake Materials to Extremely Wear-Resistant Self-Lubrication Materials via Tuning Interface Nanostructures

Qinglun Che<sup>a,b</sup>, Ga Zhang<sup>\*b,c</sup>, Ligang Zhang<sup>b</sup>, Huimin Qi<sup>b,d</sup>, Guitao Li<sup>b</sup>, Chao Zhang<sup>e</sup>, Feng Guo<sup>a</sup>

<sup>a</sup>College of Mechanical Engineering, Qingdao University of Technology, Qingdao 266033, China

<sup>b</sup>State Key Laboratory of Solid Lubrication, Lanzhou Institute of Chemical Physics, Chinese  
Academy of Sciences, Lanzhou 730000, China

<sup>c</sup>Qingdao Center of Resource Chemistry & New Materials, Qingdao 266071, China

<sup>d</sup>University of Chinese Academy of Sciences, Beijing 100049, China

<sup>e</sup>College of Mechanical Engineering, Yangzhou University, Yangzhou 225127, China

\*Corresponding author: Prof. Ga Zhang

E-mail: [gzhang@licp.cas.cn](mailto:gzhang@licp.cas.cn)

Tel: +86-931-4968041

Fax: +86-931-4968180

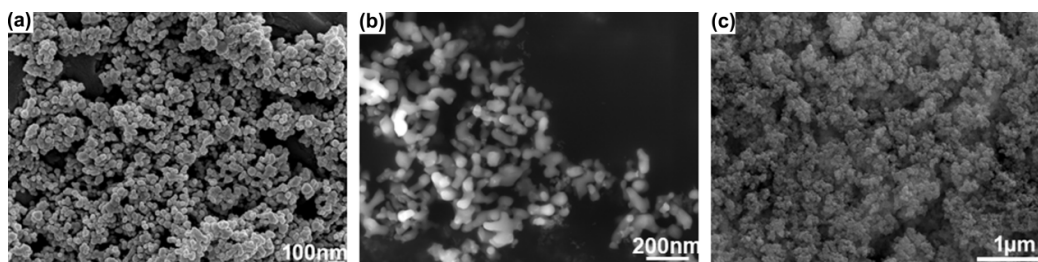

**Figure S1.** SEM morphologies of (a)  $\text{ZrO}_2$ , (b)  $\text{Al}_2\text{O}_3$  and (c)  $\text{SiO}_2$  nanoparticles.

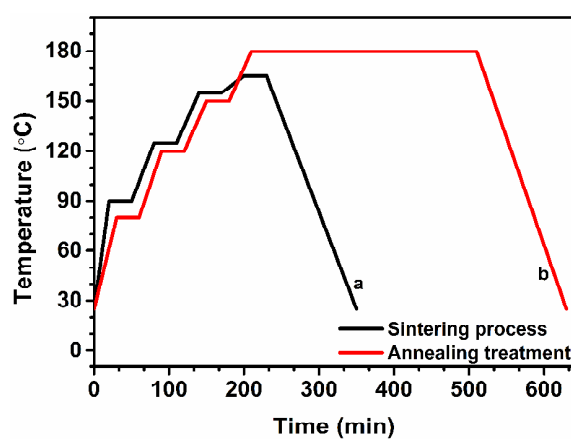

**Figure S2.** Sintering and annealing parameters (temperature, pressure and time) for preparing the composites.

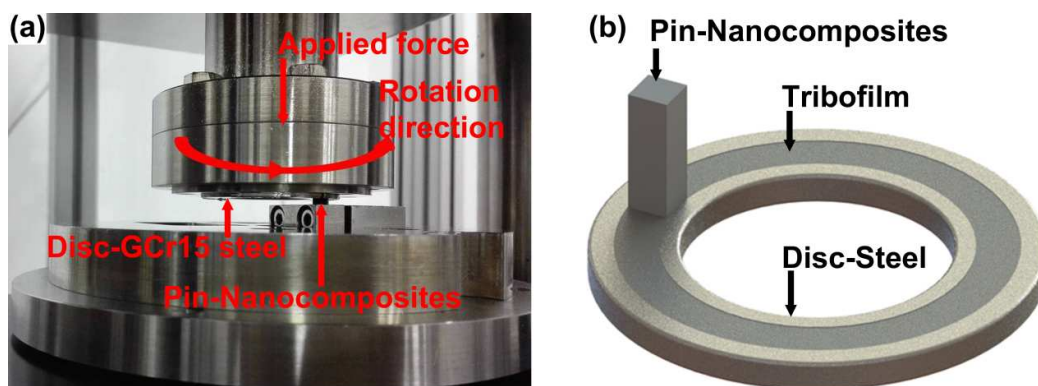

**Figure S3.** Photography of tribometer (a) and schema of contact configuration of sliding pair (b).

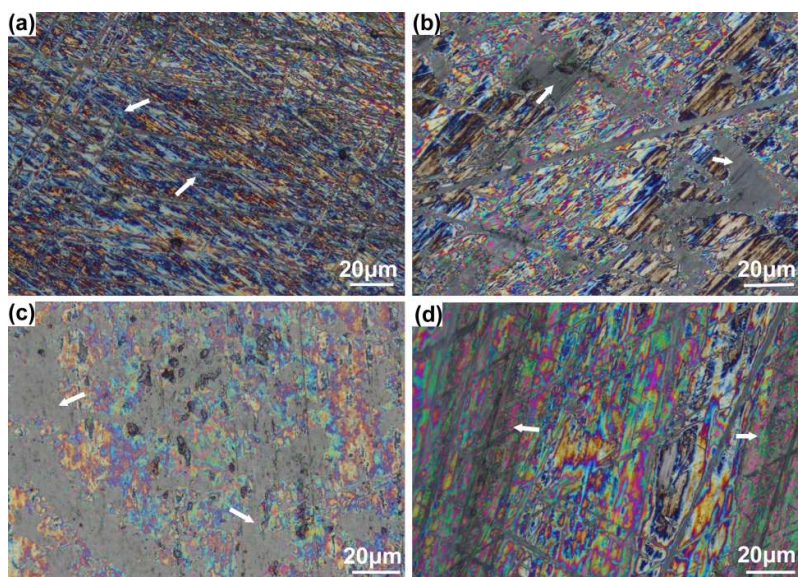

**Figure S4.** Optical micrographs of tribofilms formed on steel counterface after sliding against BraM-C (a), BraM-3Zr (b), BraM-3Al (c), and BraM-3Si (d) at 30 MPa. Arrows indicate areas covered by tribofilms.

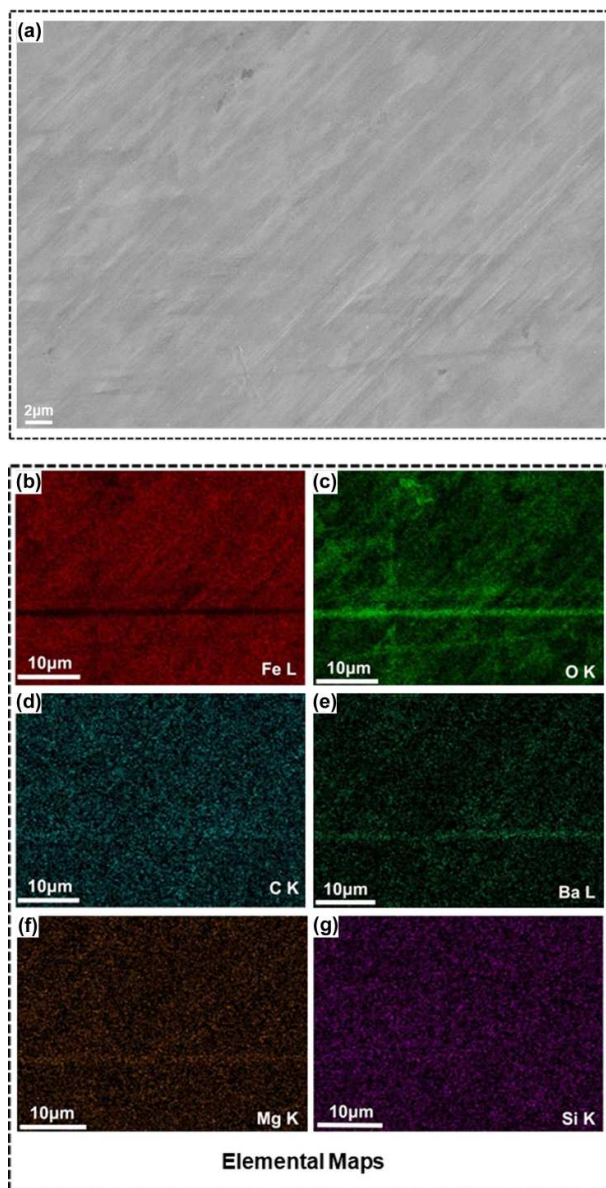

**Figure S5.** SEM micrographs (a) and EDS maps of Fe (b), O (c), C (d), Ba (e), Mg (f) and Si (g) elements of the steel surface rubbed with BraM-C at 30 MPa.
